# Supplementary material
Source: PubMed Central journal article supplement (PMC3704200)

**Supplemental Figure 1:**

Separate and merged images of different fluorescent channels used for merged images in Figure 6.

EN2

EN2 w/o HC

GLUL

CNTF

VEGF A

PEDF

DAPI

GFAP

test molecule

merge

DAPI

GFAP

test molecule

merge

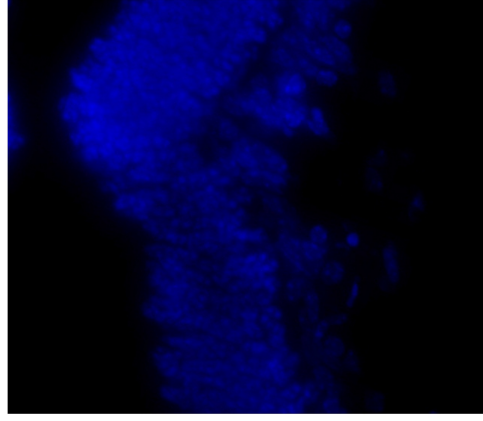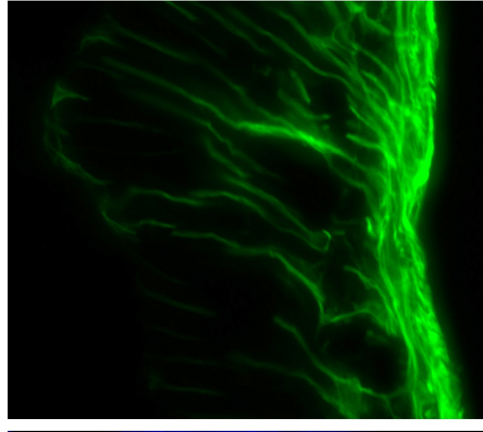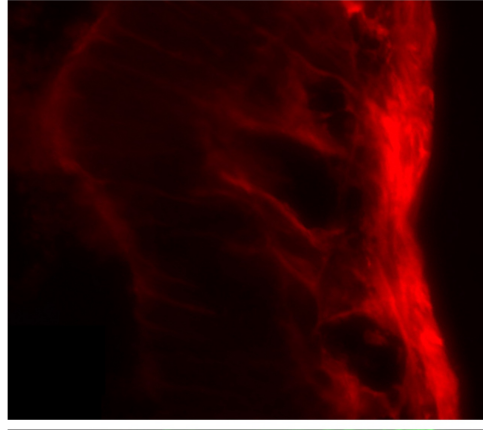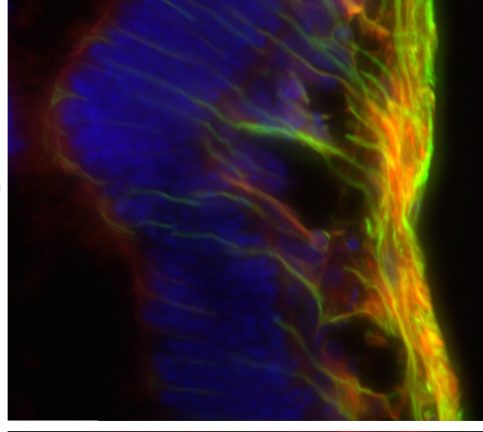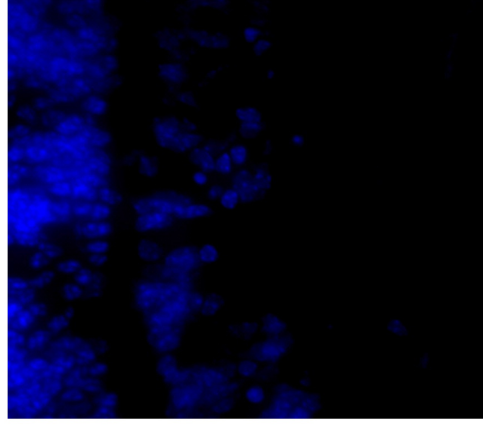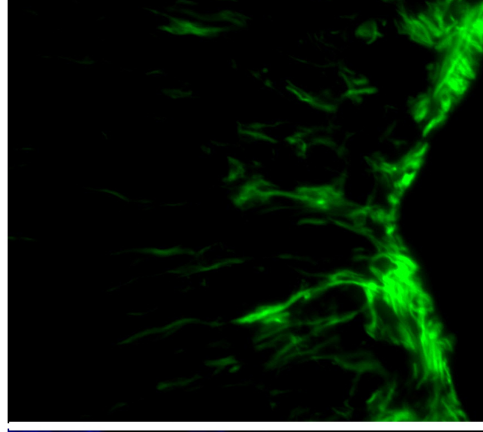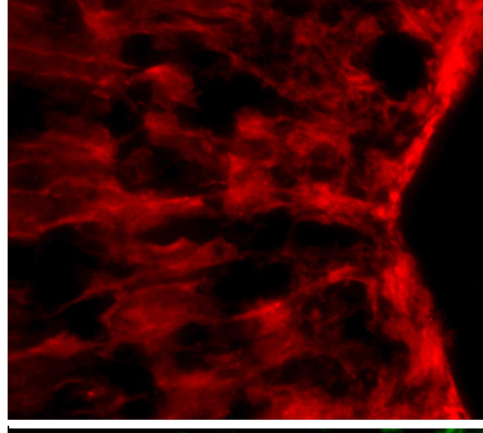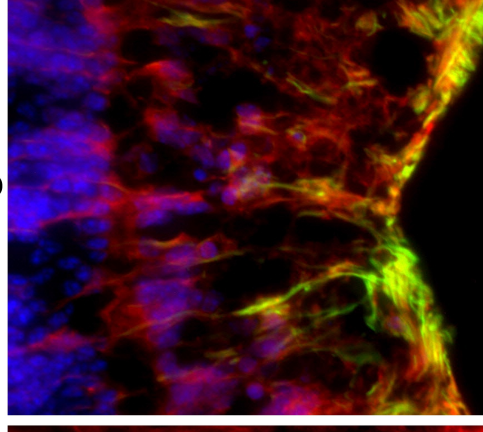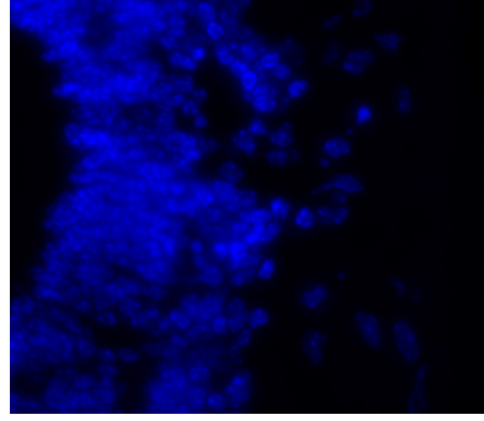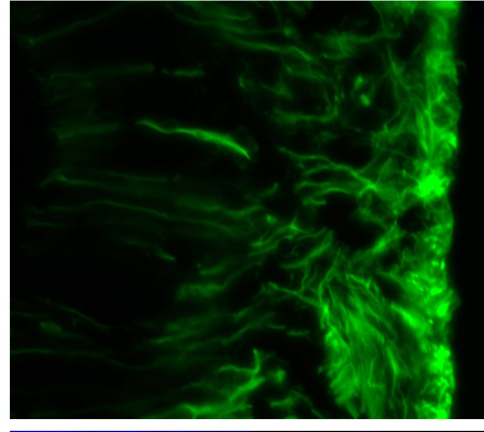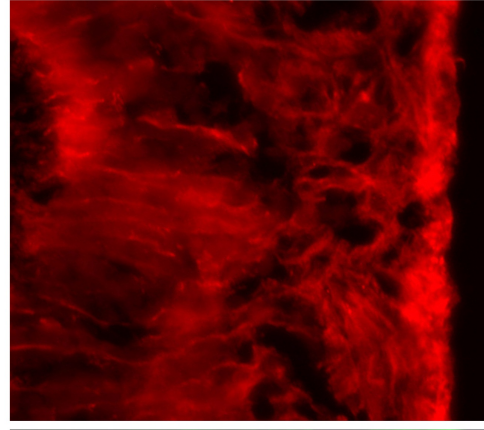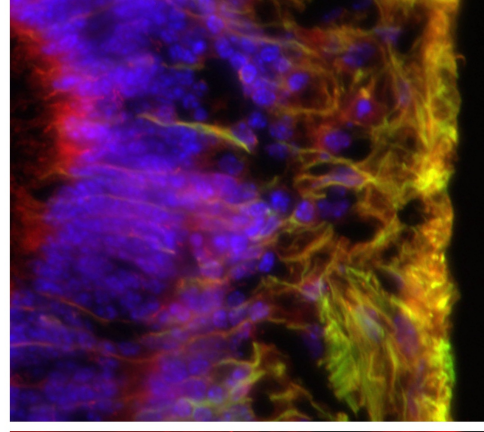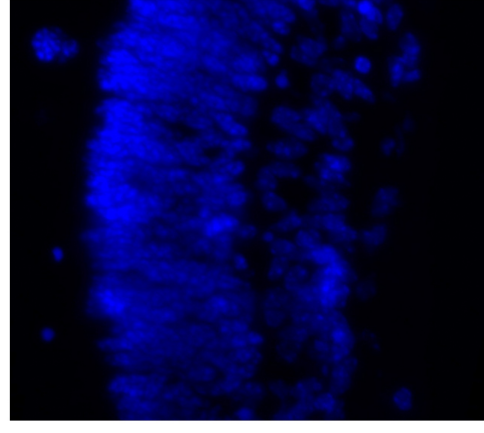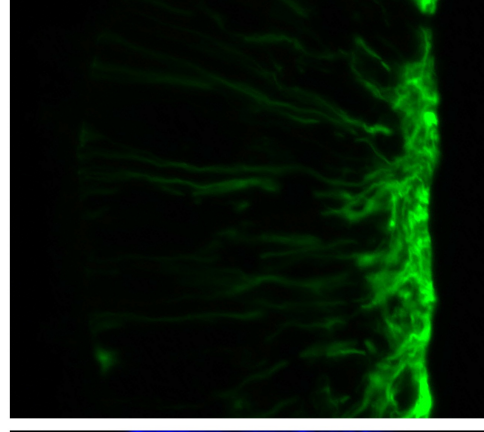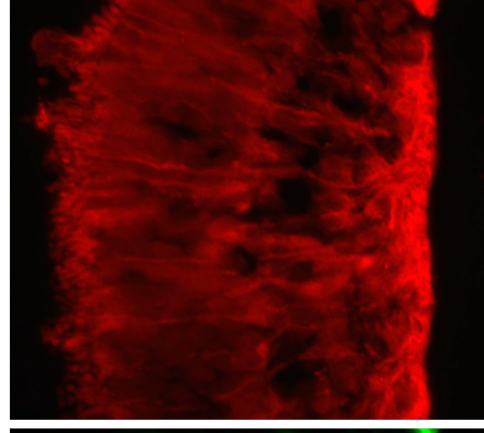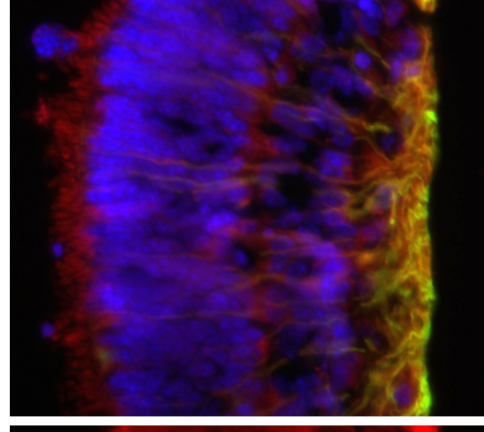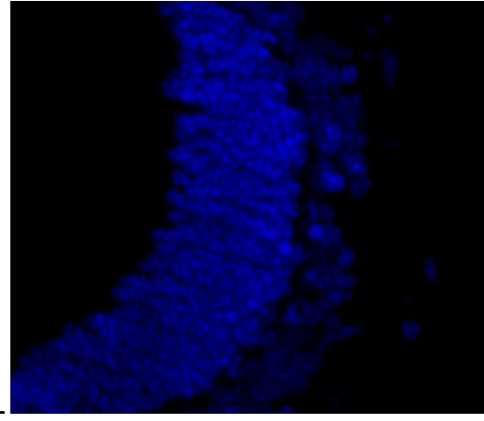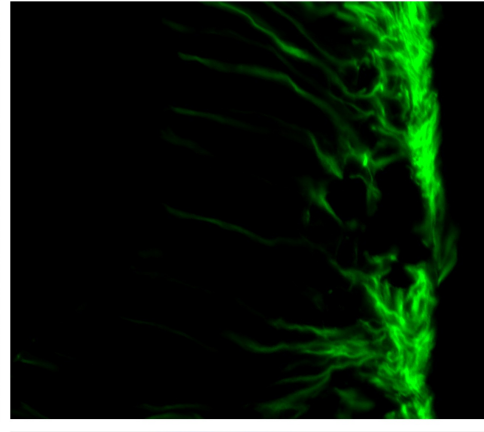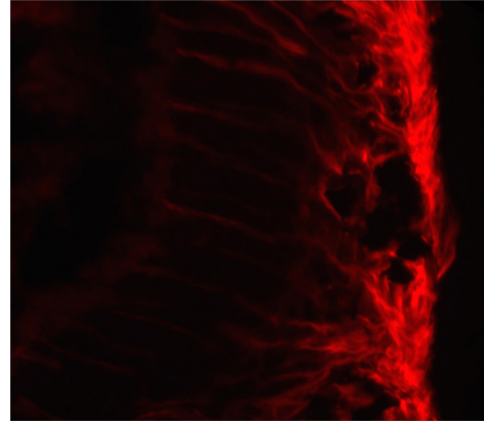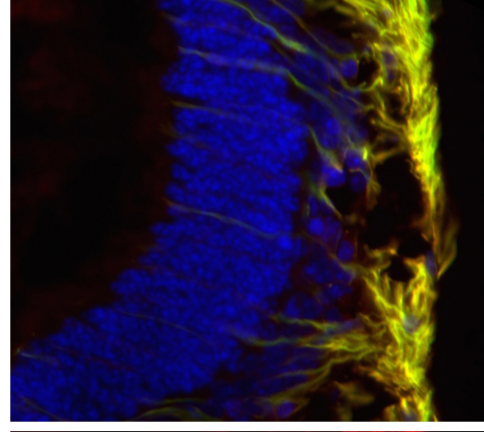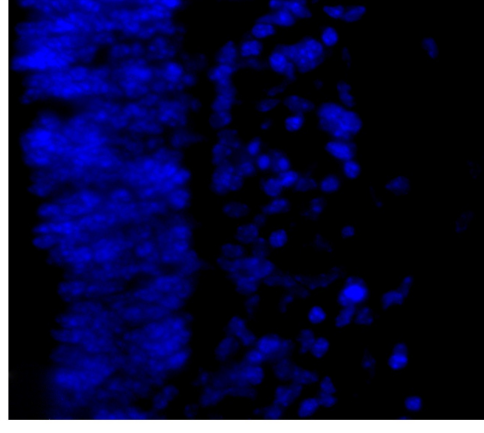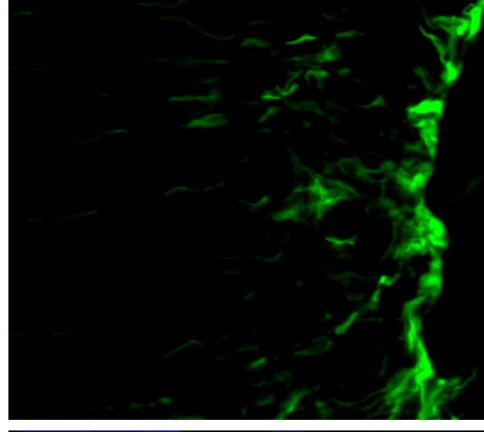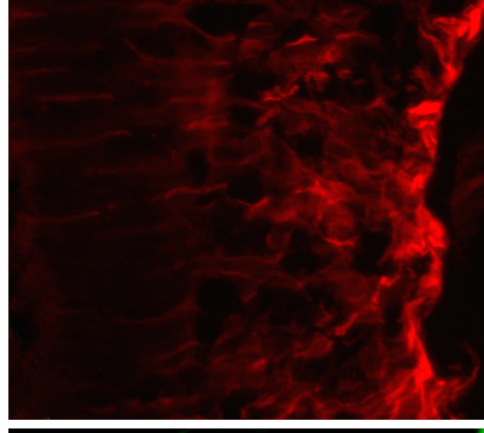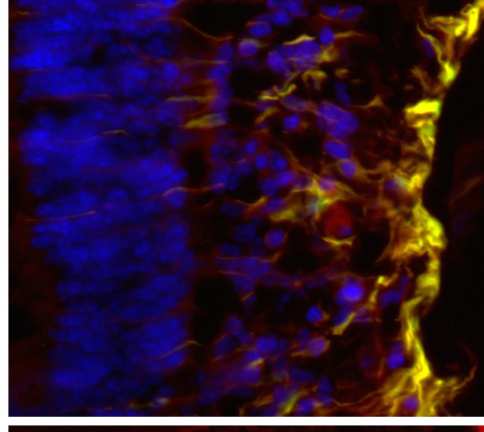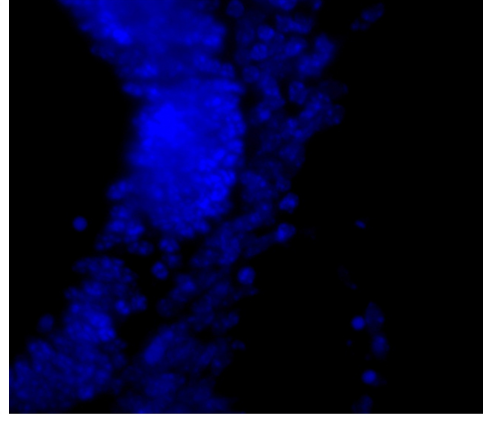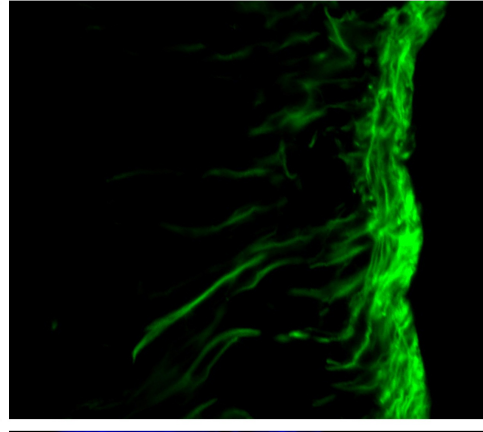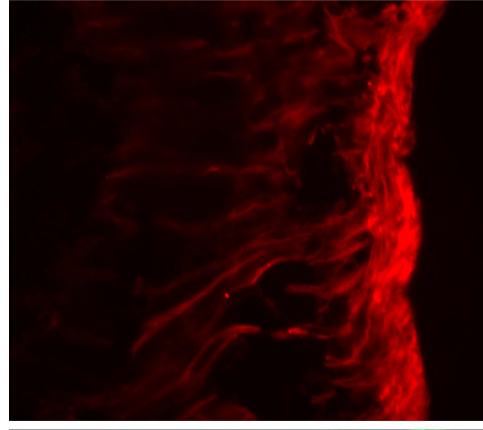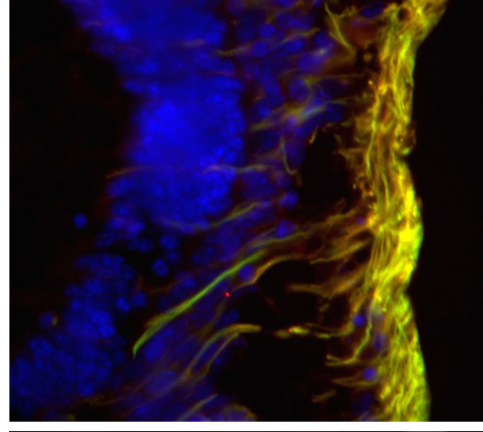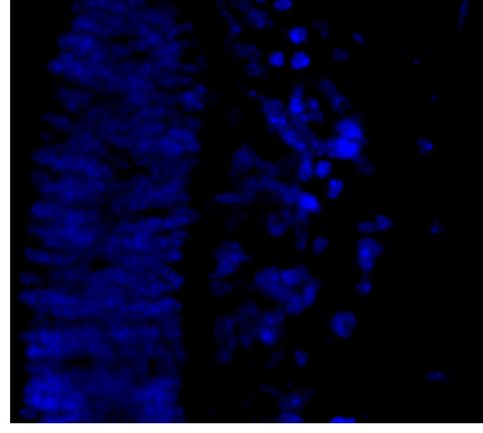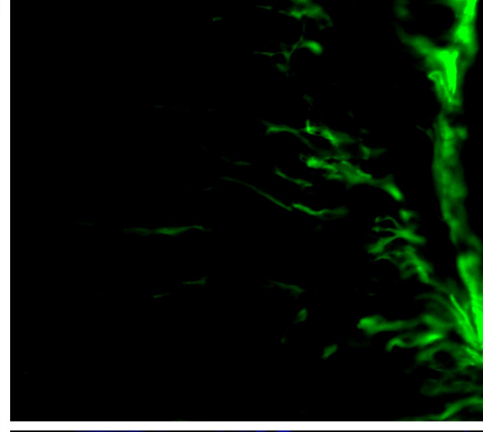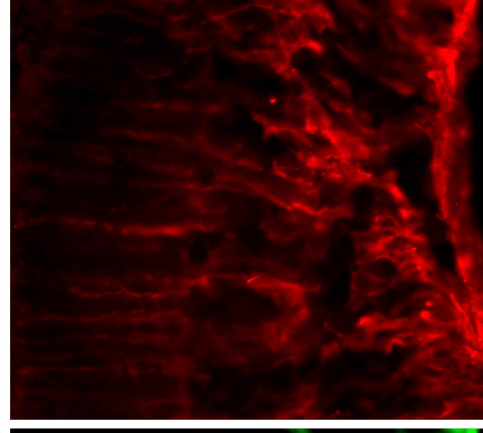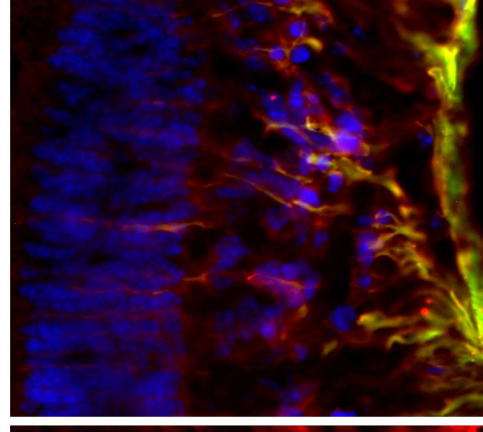

Supplement: supp_11-8646_IOVS-11-8646-s01.pdf [file supp_11-8646_IOVS-11-8646-s01.pdf]
